# Supplementary material for: Local distortion energy and coarse-grained elasticity of the twist-bend nematic phase
Source: Royal Society of Chemistry journal article supplement (doi:10.1039/c5sm02018b), 2015-10-16
Supplement: c5sm02018b1.pdf [file c5sm02018b1.pdf]

Electronic supplementary information (ESI)

for

**“Local Distortion Energy and Coarse-Grained Elasticity of the Twist-Bend Nematic Phase”**

C. Meyer<sup>a</sup> and I. Dozov<sup>a,b</sup>

**1. Local Distortion Energy in the Elastic-Instability Model**

The basic idea of the elastic-instability model <sup>1</sup> is that the bent shape of the highly anisotropic mesogenic molecules reduces the  $K_{33}$  elastic constant, making the bend less costly. This effect can be understood as a bend torque applied by the nematic molecule on its neighbors and, on average, on the director  $\mathbf{n}$ . If this torque becomes very strong,  $K_{33}$  may change sign, transforming the uniform state  $\nabla\mathbf{n}=0$  into a local maximum or saddle point of the elastic energy: the nematic is spontaneously bent to avoid this *unstable equilibrium* state, which gives rise to elastic instabilities.

This counter-intuitive  $K_{33}<0$  picture raised strong objections. However, recent experimental <sup>2-4</sup> and theoretical <sup>5-7</sup> studies confirm it, e.g. showing strong pretransitional decrease of  $K_{33}$  for bent-shape nematogens. To understand the physical meaning of  $K_{33}<0$ , let us consider the Landau – de Gennes expansion of the nematic energy  $f_{LdG}(\mathbf{Q}, \nabla\mathbf{Q}, \nabla\nabla\mathbf{Q}, \dots)$  in series of the order parameter tensor  $\mathbf{Q}$  and its gradients. For constant scalar order parameter  $S$ , one-dimensional variation of the director  $\mathbf{n}=\mathbf{n}(z)$  and up to fourth order in the gradient operator, it transforms <sup>1</sup> into a *minor extension* of Frank’s <sup>8</sup> curvature energy:

$$f(\mathbf{n}, \nabla\mathbf{n}, \nabla\nabla\mathbf{n}, \dots) = \frac{1}{2} [K_{11}\mathbf{s}^2 + K_{22}t^2 + K_{33}\mathbf{b}^2] + \frac{1}{4} \left\{ C_1 \left[ \frac{d^2(n_i n_k)}{dz^2} \right]^2 + 2C_2 \left[ \frac{d^2(n_z n_k)}{dz^2} \right]^2 + C_3 \left[ \frac{d^2(n_z^2)}{dz^2} \right]^2 \right\}, \quad (\text{S1})$$

containing all the terms allowed by the uniaxial nematic symmetry (for achiral molecules). Here, the vectors  $\mathbf{s} = \mathbf{n}(\nabla \cdot \mathbf{n})$  and  $\mathbf{b} = \mathbf{n} \times (\nabla \times \mathbf{n})$ , and the pseudo-scalar  $t = \mathbf{n} \cdot (\nabla \times \mathbf{n})$  describe respectively the splay, bend and twist distortion of the director, and  $C_i$  are fourth-order elastic coefficients. The sign of all the *second-order* coefficients in the energy density (S1), including  $K_{33}$ , may be *positive or negative*, as long as the positive fourth order terms bound from below the density energy. In fact, the usual  $K_{ii} > 0$  condition holds only if the series is cut-off at the second order terms, and is not imposed by any physically-sound selection rules, e.g. based on symmetry.

For  $K_{33} > 0$ , the solution minimizing eqn (S1) is the usual uniform nematic. For  $K_{33} < 0$ , two different spontaneously distorted solutions are possible <sup>1</sup>, the twist-bend and splay-bend solutions (the pure bend is geometrically forbidden). In the twist-bend case, of interest here, the director field is heliconical,  $\mathbf{n}(z) = (\sin \theta \cos qz, \sin \theta \sin qz, \cos \theta)$ . For a perfect heliconical structure, the energy reduces, in the  $\sin^2 \theta \ll 1$  limit, to

<sup>a</sup> Physique des Systèmes Complexes, Université de Picardie Jules Verne, 80039 Amiens, France

<sup>b</sup> Laboratoire de Physique des Solides, UMR 8502 CNRS-Université Paris-Sud, Bât. 510, 91405 Orsay Cedex, France

$$f_{ib} = \frac{1}{2} \left[ K_{22} q^2 \sin^4 \theta + K_{33} q^2 \sin^2 \theta \cos^2 \theta + C q^4 \sin^2 \theta \right] \simeq \frac{1}{2} \left[ K_{22} q^2 \sin^4 \theta + K_{33} q^2 \sin^2 \theta + C q^4 \sin^2 \theta \right], \quad (\text{S2})$$

with  $C=C_1+C_2$  (here, we anticipate the result of eqn (S3), showing that for small values of  $|K_{33}|$ , both  $\sin^2 \theta_0$  and  $q_0^2$  are small and proportional to  $|K_{33}|$ . We then only keep the terms up to order  $|K_{33}|^3$ , which simplifies substantially the calculations). For  $K_{33} > 0$ , the energy is minimized for  $\theta = 0$ , the usual uniform nematic, whereas for  $K_{33} < 0$  the stable solution is the twist-bend nematic with:

$$\sin^2 \theta_0 = -\frac{K_{33}}{3K_{22}}; \quad q_0^2 = -\frac{K_{33}}{3C}; \quad f_0 = \frac{1}{6} K_{33} q_0^2 \sin^2 \theta_0 = -\frac{1}{2} K_{22} q_0^2 \sin^4 \theta_0. \quad (\text{S3})$$

A second order N – N<sub>TB</sub> phase transition is expected at the temperature T\* defined by  $K_{33}=0$ . Both  $\sin^2 \theta_0$  and  $q_0^2$  behave as order parameters of this transition<sup>1</sup>, resulting in an atypical temperature dependence of the condensation energy  $f_0$ . Assuming, as usual, a linear variation of  $K_{33}$  close to T\*,  $K_{33} = a(T - T^*)$ , and neglecting the slow temperature dependence of the other constants, we obtain  $f_0 \sim (T - T^*)^3$ , instead of the usual  $(T - T^*)^2$  dependence.

Close to T\*,  $|K_{33}| \ll 1$  and we can choose  $\sin^2 \theta_0 \ll 1$  as a small parameter for the calculation of the coarse-grained (CG) energy coefficients, keeping systematically only the terms of lower order in  $\sin^2 \theta_0$  (and therefore in  $|K_{33}|$ ).

## 2. Coarse-Grained Approximation

The coarse-grained energy

$$f_{TB}^{CG} = f_{TB}^{cond}(|\sigma|) + f_{TB}^{grad}(\sigma, \delta \mathbf{N}) + f_{TB}^{dist}(\nabla \delta \mathbf{N}), \quad (\text{S4})$$

where  $f_{TB}^{grad}(\sigma, \delta \mathbf{N}) = \gamma_{\parallel} |\nabla_{\parallel} \sigma|^2 + \gamma_{\perp} |(\nabla_{\perp} - i q_0 \delta \mathbf{N}) \sigma|^2$

$$\text{and } f_{TB}^{dist}(\nabla \delta \mathbf{N}) = \frac{1}{2} \left[ K_{11}^N (\mathbf{s}^N)^2 + K_{22}^N ((t^N)^2 - 2 t_0^N t^N) + K_{33}^N (\mathbf{b}^N)^2 \right]$$

is based on the uniaxial large-scale symmetry of the N<sub>TB</sub> phase. As long as the deviations  $\delta \sigma$  and  $\delta \mathbf{N}$  from the equilibrium values remain small and with slow spatial variations, this expression is valid and independent of the choice of the local elasticity model.

To calculate the coefficients in eqn (S4) we use explicitly the elastic-instability model<sup>1</sup>. We only consider small deviations from equilibrium and we average the energy density over one period of the undistorted twist-bend nematic. Obviously, this procedure only makes sense if the results, in terms of the amplitude,  $\delta$ , and relaxation length,  $\lambda$ , of the distortions, are compatible with the CG approximations,  $\delta^2 \ll 1$  and  $\lambda^2 q_0^2 \gg 1$ . Coarse-grained results violating these conditions are clearly unphysical and will be discarded. In such a case, one should apply directly the local elastic model, instead of the coarse-grained approach (for example, this is probably the case when edge dislocations of the N<sub>TB</sub> pseudo-layers are considered).

We note that the distortion energy may be transformed into the more usual expression

$$f_{TB}^{dist}(\nabla \delta \mathbf{N}) = \frac{1}{2} \left[ K_{11}^N (\mathbf{s}^N)^2 + K_{22}^N (t^N - t_0^N)^2 + K_{33}^N (\mathbf{b}^N)^2 \right] + const ,$$

often used in similar contexts with omission of the constant term  $-K_{22}^N (t_0^N)^2 / 2$ . We avoid this approach here, because the “constant” term is strongly temperature-dependent and should be explicitly taken into account, e.g. when comparing the energies of the N and N<sub>TB</sub> phases.

## 2.1 Condensation Energy of the Twist-Bend Nematic

The condensation energy of the distorted N<sub>TB</sub> is obtained directly from eqn (S2) by assuming  $|\sigma| = |\sigma_0| + \delta\sigma$ , i.e.  $\theta \approx \theta_0 + \delta\theta$ , and  $q = q_0$  :

$$f_{TB}^{cond}(|\sigma|) = f_0 + K_{\delta\sigma} \delta\sigma^2 \quad (S5)$$

where  $f_0 \approx -K_{22} q_0^2 \theta_0^4 / 2$  is the N<sub>TB</sub> condensation energy at equilibrium and  $K_{\delta\sigma} \approx -2K_{33} q_0^2 / 3$  is an elastic coefficient describing the excess energy due to a small variation  $\delta\theta$  of the heliconical tilt angle. Note that we assume here  $q = q_0$ , as the compression energy is already taken into account in the  $\gamma_{\parallel}$  term of the CG energy.

## 2.2 Gradient Energy of the Twist-Bend Nematic

The calculation of the coefficient  $\gamma_{\parallel}$  is straightforward, assuming  $|\sigma| \equiv |\sigma_0|$ ,  $\delta \mathbf{N} \equiv 0$  and a small uniform variation of the wave vector,  $q = q_0 + \delta q$ ,  $\delta q^2 \ll 1$ . Comparing the CG expression with the excess local energy, due to the “layer” compression, we obtain:

$$\gamma_{\parallel} = -2K_{33} / 3. \quad (S6)$$

This expression (as well as that for  $K_{\delta\sigma}$ ) has been derived without using the CG approximations, and remains valid even for strong layer compression.

The  $\gamma_{\perp}$  coefficient has been already calculated<sup>9</sup> (with slightly different notations) by considering a small uniform tilt of the optic axis,  $\delta \mathbf{N} \neq 0$ ,  $\delta \mathbf{N}^2 \ll 1$ ,  $|\sigma| \equiv |\sigma_0|$  and  $q \equiv q_0$ :

$$\gamma_{\perp} = (K_{11} + K_{22}) / 4, \quad (S7)$$

where we averaged over one heliconical period, i.e. this result is really coarse-grained. We note that this value has been used to predict<sup>9</sup> the CB7CB pitch,  $p \approx 7$  nm, in excellent agreement with the experimentally measured value  $p \approx 8$  nm<sup>4, 10</sup>. This successful prediction strongly supports the CG approach and the local elastic model used here.

## 2.3 Energy for the Distortion of the Optic Axis

To calculate the energy contribution due to the distortion of the optic axis  $\mathbf{N}$ , we assume  $|\sigma| \equiv |\sigma_0|$ ,  $q \equiv q_0$  and  $\delta \mathbf{N} = (0, \alpha(\mathbf{r}), 0)$ . Here  $\alpha(\mathbf{r})$  is a small tilt of  $\mathbf{N}$ ,  $\alpha^2 = \delta \mathbf{N}^2 \ll 1$ , varying

slowly on the scale of the heliconical pitch,  $p|\nabla\alpha| \ll 1$ . We consider separately the cases of pure twist, splay and bend distortions of  $\mathbf{N}$ , assuming that  $\alpha$  is a function of only one coordinate,  $\alpha = \alpha(x_i)$ , with  $x_i = x, y, z$  respectively. The director  $\mathbf{n}$  rotates on a twist-bend cone which is tilted at angle  $\alpha$  with respect to the  $\mathbf{z}$ -axis:

$$\mathbf{n}(x_i, z) = \begin{pmatrix} \sin\theta_0 \cos(q_0 z) \\ \cos\alpha(x_i) \sin\theta_0 \sin(q_0 z) + \sin\alpha(x_i) \cos\theta_0 \\ -\sin\alpha(x_i) \sin\theta_0 \sin(q_0 z) + \cos\alpha(x_i) \cos\theta_0 \end{pmatrix}. \quad (\text{S8})$$

We calculate  $f_{TB}^{dist}$  by substituting eqn (S8) in eqn (S1), averaging the energy over one  $N_{TB}$  period and keeping only the terms of leading order in the small parameters  $\alpha^2$  and  $\theta_0^2$ . This straightforward (but rather tedious) procedure gives the elastic energy as a sum of three terms, proportional respectively to  $\alpha^2$ ,  $d\alpha/dx_i$  and  $(d\alpha/dx_i)^2$ , which should be compared with the CG expression. In all three cases, the  $\alpha^2$  term reproduces, as expected, the result  $\gamma_\perp = (K_{11} + K_{22})/4$ . The linear term  $d\alpha/dx_i$  vanishes for the splay and bend cases,  $x_i = y, z$ . This result is also expected: the spontaneous splay  $\mathbf{s}^N = \mathbf{N}(\nabla \cdot \mathbf{N})$  and bend  $\mathbf{b}^N = \mathbf{N} \times (\nabla \times \mathbf{N})$  vectors are forbidden by the large-scale  $D_\infty$  symmetry of the  $N_{TB}$  phase (exactly as in the cholesteric phase<sup>8</sup>). Only for pure twist distortion of  $\mathbf{N}$ , described by the pseudo-scalar  $t^N = \mathbf{N} \cdot (\nabla \times \mathbf{N}) \neq 0$ , the linear term survives, showing a spontaneous twist of the optic axis

$$t_0^N = q_0 \theta_0^2. \quad (\text{S9})$$

This important result requires some discussion. The energy is a true scalar, while  $t^N$  is a pseudo-scalar. Therefore,  $t_0^N$  should be a pseudo-scalar as well (like the spontaneous twist  $t_0$  in the  $N^*$  phase). However, in the  $N^*$  case, the pseudo-scalar  $t_0$  is symmetry-allowed only because the molecules are chiral. A similar argument is not valid for the  $N_{TB}$  phase constituted by achiral molecules. In this latter case, the source of the spontaneous twist is not molecular but structural: it comes from the doubly degenerate chiral heliconical structure. Indeed, above the  $N - N_{TB}$  transition, the spontaneous twist in eqn (S9),  $t_0^N = t_0$ , vanishes (because the chiral source disappears). eqn (S9) predicts a strong temperature dependence of  $t_0^N$ , in contrast to the almost constant  $t_0$  in the cholesteric phase. Moreover,  $t_0^N$  has the same symmetry as  $q_0$ , which by definition is a pseudo-scalar: in a mirror image the sign of  $q_0$  is inversed, as well as the handedness of the helix.

To avoid ambiguity, we note that  $t_0^N \neq 0$  does not imply unconditionally that the optic axis is spontaneously twisted,  $t^N \neq 0$ , in the  $N_{TB}$  ground-state: although  $t^N = t_0^N$  minimizes the distortion energy  $f_{TB}^{dist}$ , the minimum of the total CG energy  $f_{TB}^{CG}$  might be different. This  $N_{TB}$  behavior is the same as in the  $SmA^*$  phase, confirming the analogy between the two phases.

The comparison of the calculated  $(d\alpha/dx_i)^2$  terms with the CG energy gives for the elastic constants related to the curvature of the optic axis  $\mathbf{N}$

$$K_{11}^N = K_{11} ; K_{22}^N = K_{22} ; K_{33}^N = K_{33} + \frac{1}{2}(K_{11} + K_{22})\theta_0^2 = \frac{1}{2}(K_{11} - 5K_{22})\theta_0^2. \quad (\text{S10})$$

The simple result for the splay and twist cases is easy to understand. In these cases, the optic axis  $\mathbf{N}$  and the director  $\mathbf{n}$  rotate around two orthogonal axes. The two rotations are approximately uncoupled and the contribution of the cross-terms to the energy are negligible for small  $\theta_0^2$  and  $\alpha^2$ .

For the same reasons, the contributions of the  $C$ -terms to  $K_{11}^N$  and  $K_{22}^N$  can be neglected.

In the bend geometry,  $\mathbf{N}$  and  $\mathbf{n}$  rotate around the same axis and the coupled terms cannot be neglected. With the usual ratio  $K_{11}/K_{22} \sim 2$ , we expect  $K_{33}^N \approx K_{33}/2 < 0$ , and fourth-order terms in the  $\mathbf{N}$ -distortions are needed to make the CG energy converge. Indeed, our CG calculation gives an additional term of the kind:

$$\frac{1}{2}C \left( \frac{d^2\alpha}{dz^2} \right)^2. \quad (\text{S11})$$

For simplicity, we omitted this term in eqn (S4) because the related penetration length is too short (see further), which shows that the CG approximation is unphysical for optic axis  $\mathbf{N}$  bending.

### 3. Penetration Lengths of the Twist-Bend Nematic

Any distortion of the equilibrium  $\mathbf{N}_{\text{TB}}$  structure relaxes over some characteristic length-scale. The coherence lengths,  $\xi_{\parallel}$  and  $\xi_{\perp}$ , describe the exponential relaxation of a small perturbation of the heliconical tilt angle,  $\delta\theta$ , respectively along and perpendicular to the helix axis. These coherence lengths have been calculated and discussed in the main text. A small perturbation of the optic axis,  $\delta\mathbf{N}$ , will also relax over an anisotropic characteristic length, the penetration length of the  $\mathbf{N}$ -distortions.

To estimate the penetration lengths  $\lambda_i$ ,  $i=1,2,3$ , corresponding to the main modes, respectively splay, twist and bend, of distortion of the optic axis  $\mathbf{N}$ , we consider again a small tilt  $\delta\mathbf{N} = (0, \alpha(\mathbf{r}), 0)$  imposed at the boundary of the sample, e.g. by surface anchoring (Fig. S1). Except for the distortion of  $\mathbf{N}$ , we assume a perfect  $\mathbf{N}_{\text{TB}}$  structure, with  $|\sigma| \equiv |\sigma_0|$  and  $\mathbf{q} \equiv \mathbf{q}_0$ .

For the splay case, the energy due to the tilt of the optic axis is  $\gamma_{\perp} q_0^2 \theta_0^2 \alpha^2$ , the “gradient” energy is  $K_{11}^N (d\alpha/dy)^2/2$ , and the total energy is minimized for

$$\alpha(y) = \alpha_s \exp(-y/\lambda_1) \quad ; \quad \lambda_1 = \sqrt{\frac{K_{11}^N}{2\gamma_{\perp} q_0^2 \theta_0^2}} = \frac{1}{q_0 \theta_0} \sqrt{\frac{2K_{11}}{K_{11} + K_{22}}}, \quad (\text{S12})$$

where  $\alpha_s$  is the tilt of  $\mathbf{N}$  imposed at the surface. A similar result is obtained in the twist case

$$\alpha(x) = \alpha_s \exp(-x/\lambda_2) \quad ; \quad \lambda_2 = \sqrt{\frac{K_{22}^N}{2\gamma_{\perp} q_0^2 \theta_0^2}} = \frac{1}{q_0 \theta_0} \sqrt{\frac{2K_{22}}{K_{11} + K_{22}}}. \quad (\text{S13})$$

In both cases,  $\lambda_i \approx 1/q_0 \theta_0 \gg 1/q_0$ , satisfying the main coarse-grained condition of slow variation of the tilt on the scale of the heliconical pitch  $p$ .

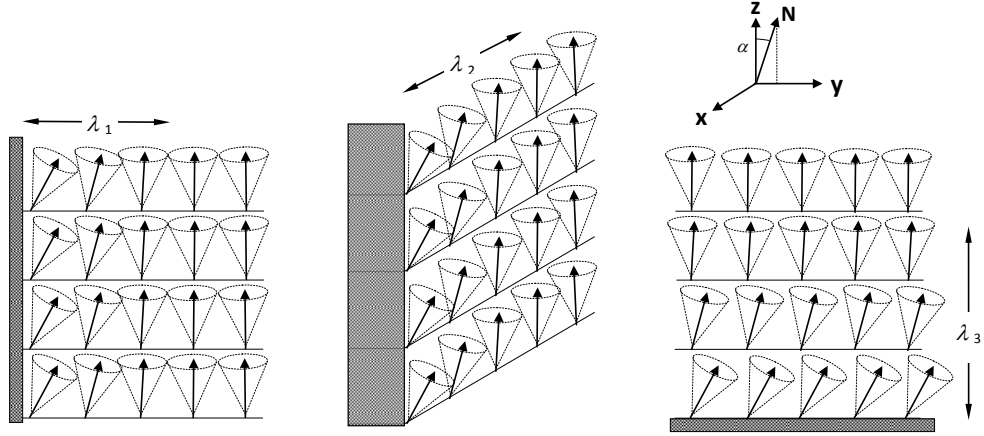

**Fig. S1.** Penetration lengths  $\lambda_i$ ,  $i=1,2,3$ , for the main distortion modes of the optic axis  $\mathbf{N}$ , respectively splay, twist and bend. A small tilt  $\delta\mathbf{N}=(0,\alpha(\mathbf{r}),0)$  of the optic axis, imposed on the surface boundary, penetrates in the bulk twist-bend nematic only over the length-scale defined by  $\lambda_i$ .

The bend case is more complicated due to the negative bend constant  $K_{33}^N$ . Oscillating solutions are now possible, with splay-bend or twist bend superstructures of the optic axis  $\mathbf{N}$ . In both cases, we need to take into account the fourth-order term in eqn (S11), in order to avoid the divergence of the oscillation of wave vector  $\mathbf{k}$ . For a splay-bend distortion of  $\mathbf{N}$ , the excess CG energy due to  $\delta\mathbf{N}=(0,\alpha(z),0)$  reads:

$$\gamma_{\perp} q_0^2 \theta_0^2 \alpha^2 + \frac{1}{2} C \left( \frac{d^2 \alpha}{dz^2} \right)^2 + \frac{1}{2} K_{11}^N \alpha^2 \left( \frac{d\alpha}{dz} \right)^2 + \frac{1}{2} K_{33}^N \left( \frac{d\alpha}{dz} \right)^2. \quad (\text{S14})$$

After linearization, the solution of the Euler – Lagrange equation is a damped oscillation:

$$\alpha \sim \exp(-z/\lambda_3) \sin k_3 z, \quad \text{with } \lambda_3 = \left( q_0 \theta_0 \sqrt{\frac{\gamma_{\perp}}{2C} + \frac{K_{33}^N}{4C}} \right)^{-1/2}; \quad k_3 = \left( q_0 \theta_0 \sqrt{\frac{\gamma_{\perp}}{2C} - \frac{K_{33}^N}{4C}} \right)^{1/2}. \quad (\text{S15})$$

Taking  $K_{33}^N \approx K_{33}/2$  as before, we obtain  $\lambda_3 \approx 2/q_0$ ;  $k_3 \approx q_0$ . These values are incompatible with the approximations used in the calculation of the coefficients of the coarse-grained energy. Similar results are obtained if we consider a twist-bend structure of the optic axis  $\mathbf{N}$ .

Therefore, the relaxation of the bend of  $\mathbf{N}$ , occurring over a scale smaller than the  $N_{TB}$  pitch  $p$ , cannot be described in the CG model. In some cases, for example in the vicinity of an edge dislocation, the local elastic model should be used directly, instead of the simpler CG approach.

#### 4. Analogy with the TGB<sub>A</sub> phase

By analogy with SmA\*, we expect that the Type I / Type II behavior of the NTB phase will depend on the value of the relevant Ginsburg parameter,

$$k_t = \frac{\lambda_2}{\xi_\perp} = \frac{4K_{22}}{K_{11} + K_{22}}.$$

Taking approximately  $K_{11}/K_{22} \sim 2$ , we have  $k_t \approx 4/3$ , which is about twice the value  $k_t = 1/\sqrt{2}$  required for Type II behavior. We expect then, for strong enough spontaneous chiral field,  $h > h_{c1}$ , the penetration of the twist of  $\mathbf{N}$  in the  $N_{TB}$  structure by nucleation of screw dislocations of the pseudo-layers. The value of  $k_t$  does not depend on temperature, as in the  $SmA^*$  case. However, the spontaneous twist of the  $N_{TB}$  optic axis,  $t_0^N = q_0 \theta_0^2$ , has a strong temperature dependence, in contrast to the temperature-independent spontaneous twist  $t_0$  in the  $SmA^*$ . Therefore, the chiral field applied to the  $N_{TB}$  phase,  $h = K_{22}^N t_0^N = K_{22} q_0 \theta_0^2$ , is also strongly temperature-dependent, unlike its  $SmA^*$  analog,  $K_{22} t_0$ .

The rigorous calculation of the critical field  $h_{c1}$  for the  $TGB_{NTB}$ , the twist-bend nematic analog of the  $TGB_A$  phase, is a difficult task because of the moderate value of  $k_t$ . However, again by analogy with the  $SmA^*$ <sup>11</sup>, we can estimate  $h_{c1}$  for strongly Type II  $N_{TB}$  materials,  $k_t \gg 1$ . Let us compare, for  $T < T^*$ , the energy of the  $N_{TB}$  and  $TGB_{NTB}$  phases. In a perfect  $N_{TB}$ ,  $t^N = 0$  and the energy density is just the condensation energy,  $f(N_{TB}) = -K_{22} q_0^2 \theta_0^4 / 2$ . In the  $TGB_{NTB}$  phase, the energy is  $f(TGB_{NTB}) = -K_{22} q_0^2 \theta_0^4 / 2 + f(\text{disl}) + f(\bar{t}^N)$ . Here,  $f(\text{disl}) > 0$  is the energy of the network of screw dislocations in the grain boundaries (GB). Approximately,  $f(\text{disl}) = \mu / (l_b l_d)$ , where  $\mu$  is the energy cost of dislocation per unit length,  $l_b$  is the distance between the GBs, and  $l_d$  is the distance between the dislocations on the GB.  $f(\bar{t}^N)$  is the energy related to the average twist  $\bar{t}^N$ , penetrating in the  $TGB_{NTB}$  phase,  $f(\bar{t}^N)$ . Geometrically,  $\bar{t}^N = p / (l_b l_d)$ , and taking into account that  $\bar{t}^N \ll t_0^N$  close to  $h_{c1}$ , we obtain  $f(\bar{t}^N) = -hp / (l_b l_d)$ . Comparing the energy densities of the  $N_{TB}$  and  $TGB_{NTB}$  phases, we obtain  $h_{c1} = \mu / p$ . For  $k_t \gg 1$ , by analogy with the  $SmA^*$ <sup>11</sup>, the main contribution to  $\mu$  is due to the distortion of the “layers” around the dislocation:

$$\mu \approx \gamma_\perp q_0^2 \theta_0^2 \frac{p^2}{4\pi} \ln \frac{\lambda_2}{\xi_\perp}; \quad h_{c1} \approx \left( \frac{K_{11} + K_{22}}{8K_{22}} \ln \frac{\lambda_2}{\xi_\perp} \right) K_{22} q_0^2 \theta_0^2 \approx \left( \frac{3}{8} \ln k_t \right) h \quad (S16)$$

Therefore, the lower critical field  $h_{c1}$  and the spontaneous chiral field  $h$  differ only by a numerical coefficient and have the same temperature dependence. If  $(3/8) \ln k_t < 1$ , as expected for moderate  $k_t$  values, then  $h > h_{c1}$  at any temperature  $T < T^*$ , and the  $TGB_{NTB}$  phase *will always be stable* with respect to the  $N_{TB}$  phase. This striking result, if confirmed by a more detailed calculation of  $f(\text{disl})$ , is one more example of the limitations of the  $N_{TB} - SmA^*$  analogy when the temperature dependence is involved.

## 5. ESI References:

1. I. Dozov, *EPL (Europhysics Letters)*, 2001, **56**, 247-253.
2. K. Adlem, M. Copic, G. R. Luckhurst, A. Mertelj, O. Parri, R. M. Richardson, B. D. Snow, B. A. Timimi, R. P. Tuffin and D. Wilkes, *Physical Review E*, 2013, **88**, 022503.

3. R. Balachandran, V. P. Panov, J. K. Vij, A. Kocot, M. G. Tamba, A. Kohlmeier and G. H. Mehl, *Liquid Crystals*, 2013, **40**, 681-688.
4. V. Borshch, Y. K. Kim, J. Xiang, M. Gao, A. Jakli, V. P. Panov, J. K. Vij, C. T. Imrie, M. G. Tamba, G. H. Mehl and O. D. Lavrentovich, *Nat. Commun.*, 2013, **4**, 2635
5. M. Cestari, E. Frezza, A. Ferrarini and G. R. Luckhurst, *Journal of Materials Chemistry*, 2011, **21**, 12303-12308.
6. C. Greco, G. R. Luckhurst and A. Ferrarini, *Soft Matter*, 2014, **10**, 9318-9323.
7. C. Greco, A. Marini, E. Frezza and A. Ferrarini, *ChemPhysChem*, 2014, **15**, 1336-1344.
8. F. C. Frank, *Discussions of the Faraday Society*, 1958, **25**, 19-28.
9. C. Meyer, G. R. Luckhurst and I. Dozov, *Physical Review Letters*, 2013, **111**, 067801.
10. D. Chen, J. H. Porada, J. B. Hooper, A. Klitnick, Y. Shen, M. R. Tuchband, E. Korblova, D. Bedrov, D. M. Walba, M. A. Glaser, J. E. MacLennan and N. A. Clark, *PNAS*, 2013, **110**, 15931-15936.
11. P. M. Chaikin and T. C. Lubensky, *Principles of Condensed Matter Physics*, Cambridge University Press, 2000.
